# Supplementary material for: An Unusual Femoral Sheath Severing with Successful Recapture: A Case Report
Source: MDPI journal article supplement (doi:10.3390/reports4040034), 2021-10-08
Supplement: s1 [file s1]

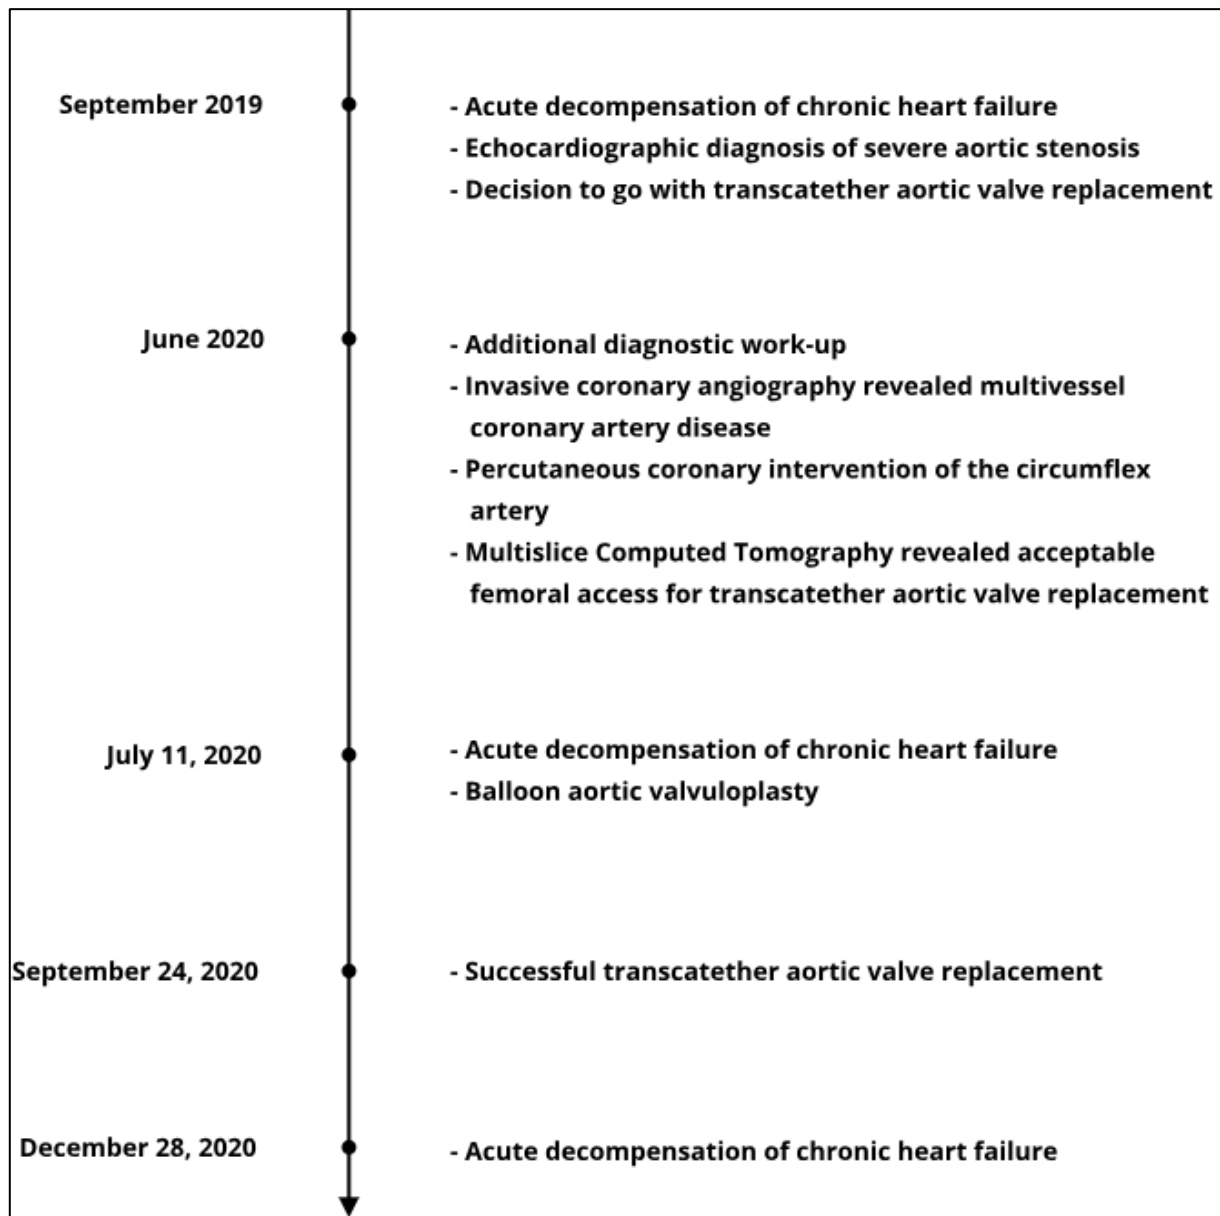

Figure S1. Timeline.

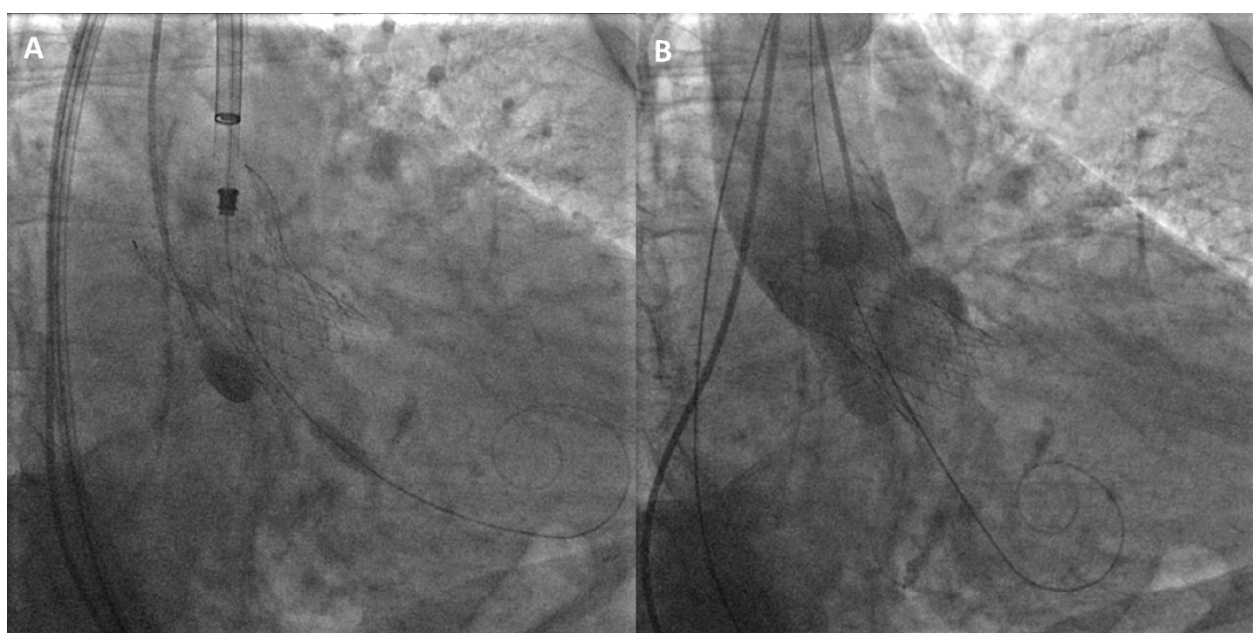

**Figure S2.** Successful implantation of the self-expanding aortic valve: (A) Implanted valve; (B) Aortography showing minimal paravalvular leak.

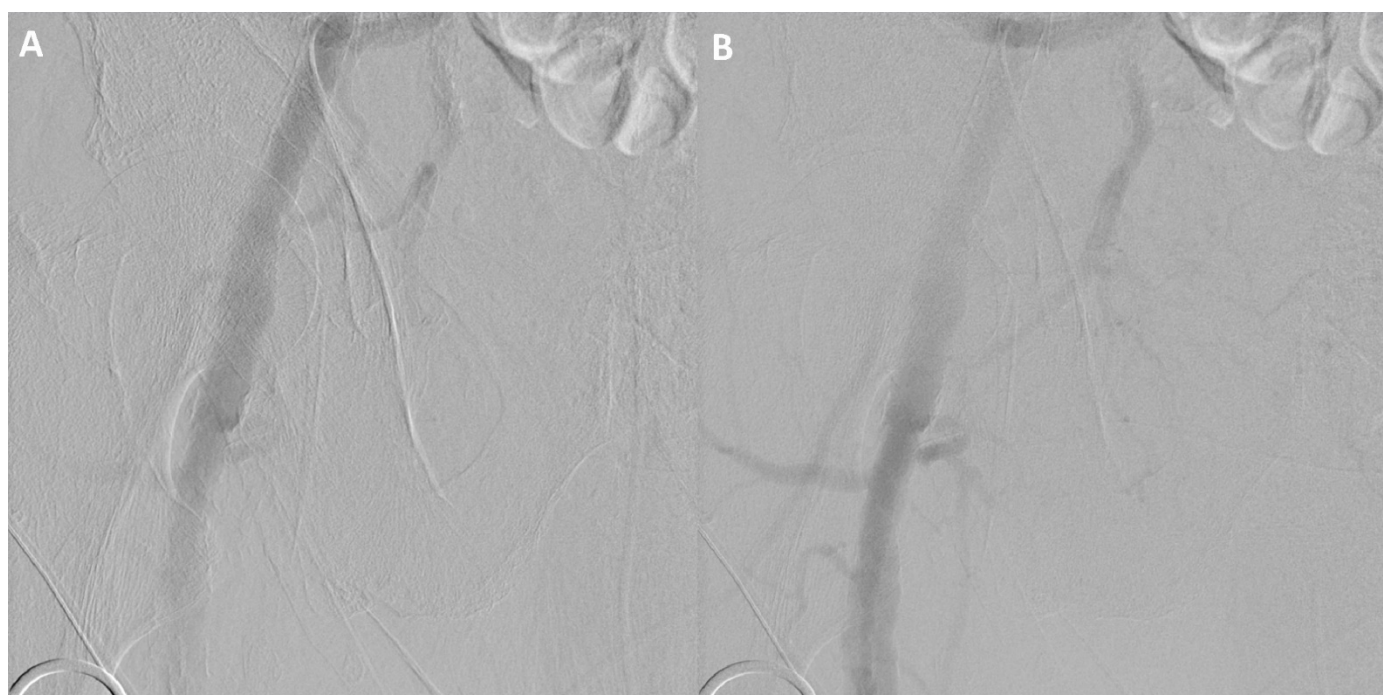

**Figure S3.** Digital subtraction angiography after the application of vascular closure device: (A) Opacification of the proximal part of common femoral artery; (B) Opacification of the distal part of common femoral artery.
