# Supplementary material for: An Unusual Femoral Sheath Severing with Successful Recapture: A Case Report
Source: MDPI journal article supplement (doi:10.3390/reports4040034), 2021-10-08
Supplement: s1 [file s1]

Archive with 1 entries (1 files):
- reports-1363761-supplementary.pdf
